# Supplementary material
Source: PubMed Central journal article supplement (PMC10673817)
Supplement: jjad096_suppl_supplementary_figures.pdf [file jjad096_suppl_supplementary_figures.pdf]

## **SUPPLEMENTARY FIGURES**

This appendix provides readers with additional figures.

Supplement to: **“Influence of Early Life Factors, including Breastmilk Composition, on the Microbiome of Infants Born to Mothers with and without Inflammatory Bowel Disease “**

## Supplementary Figure S1

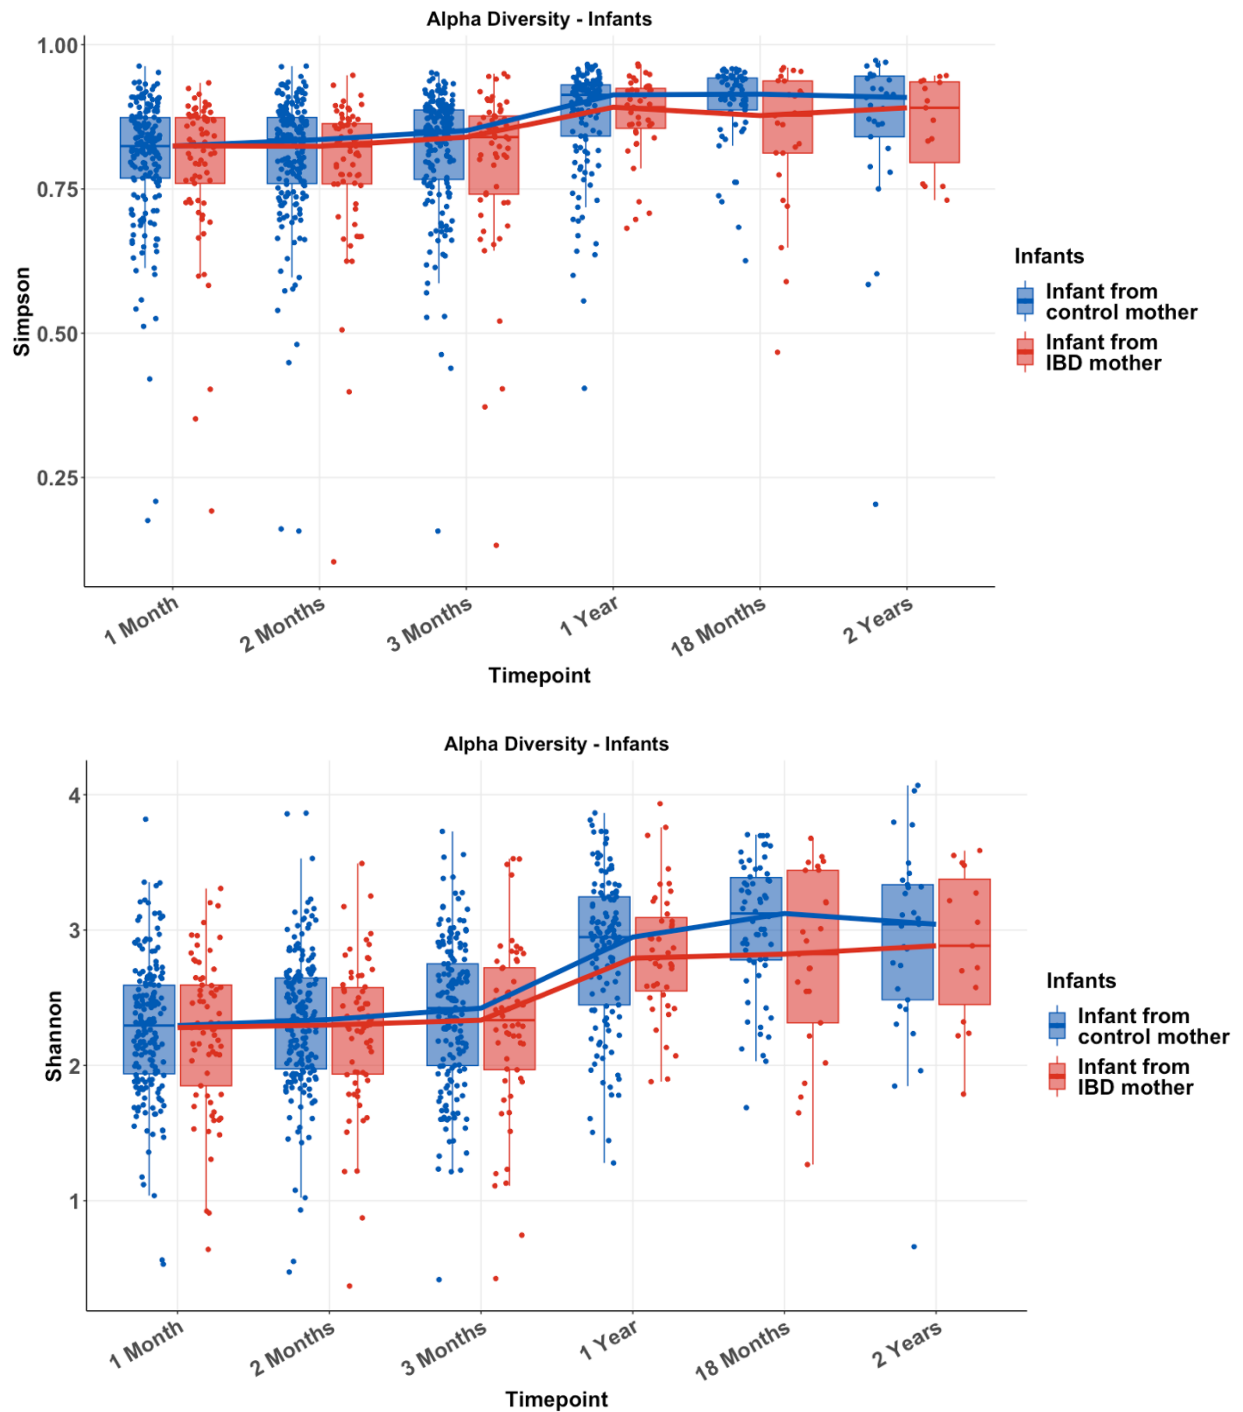

**Supplementary Figure S1**– Alpha-diversity (measured using the Simpson and Shannon Index) at each timepoint and by maternal IBD status

## Supplementary Figure S2

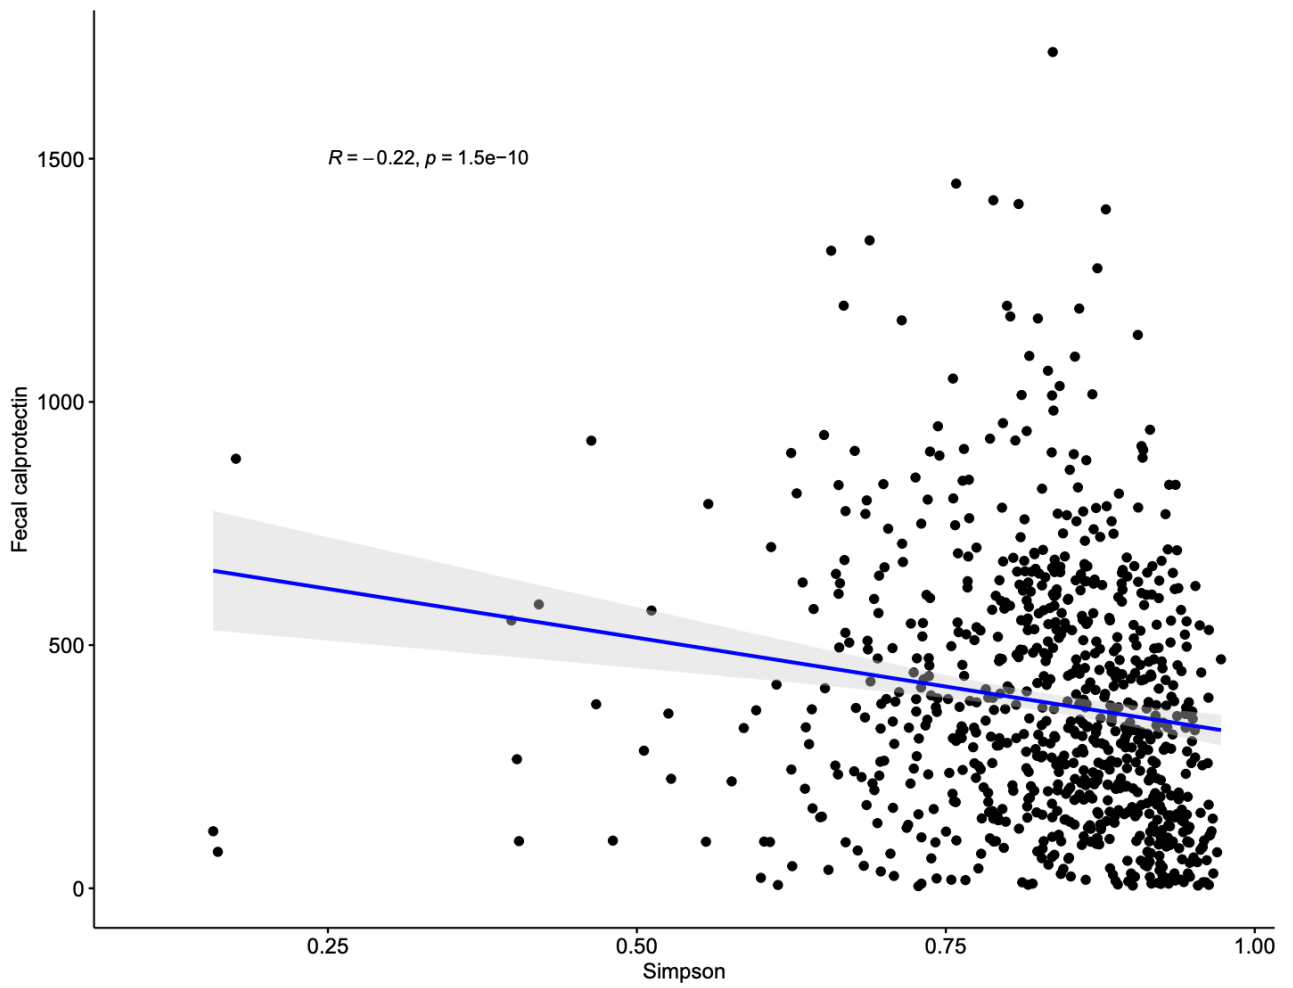

**Supplementary Figure S2**– Correlation between bacterial diversity (measured using the Simpson Index) and fecal calprotectin

## Supplementary Figure S3

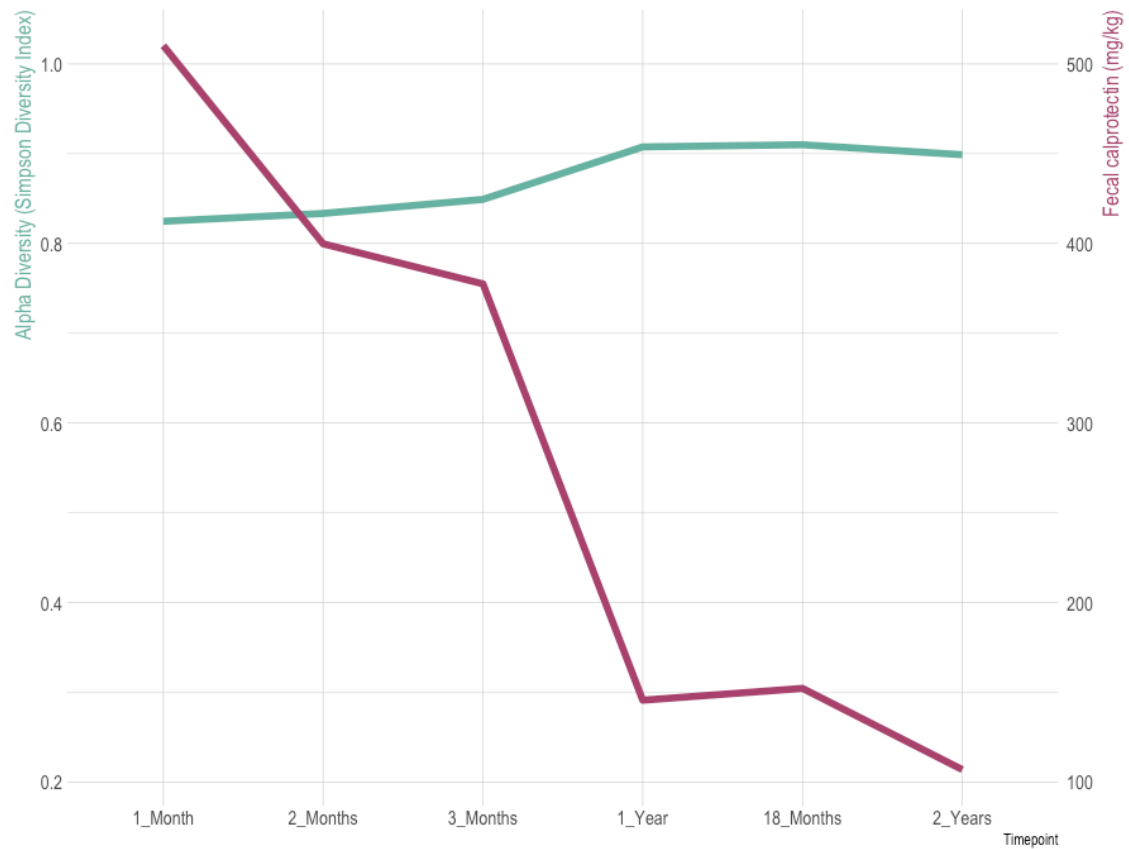

**Supplementary Figure S3**– Evolution of bacterial alpha-diversity (measured using the Simpson Index) and fecal calprotectin over time

**Supplementary Figure S4**

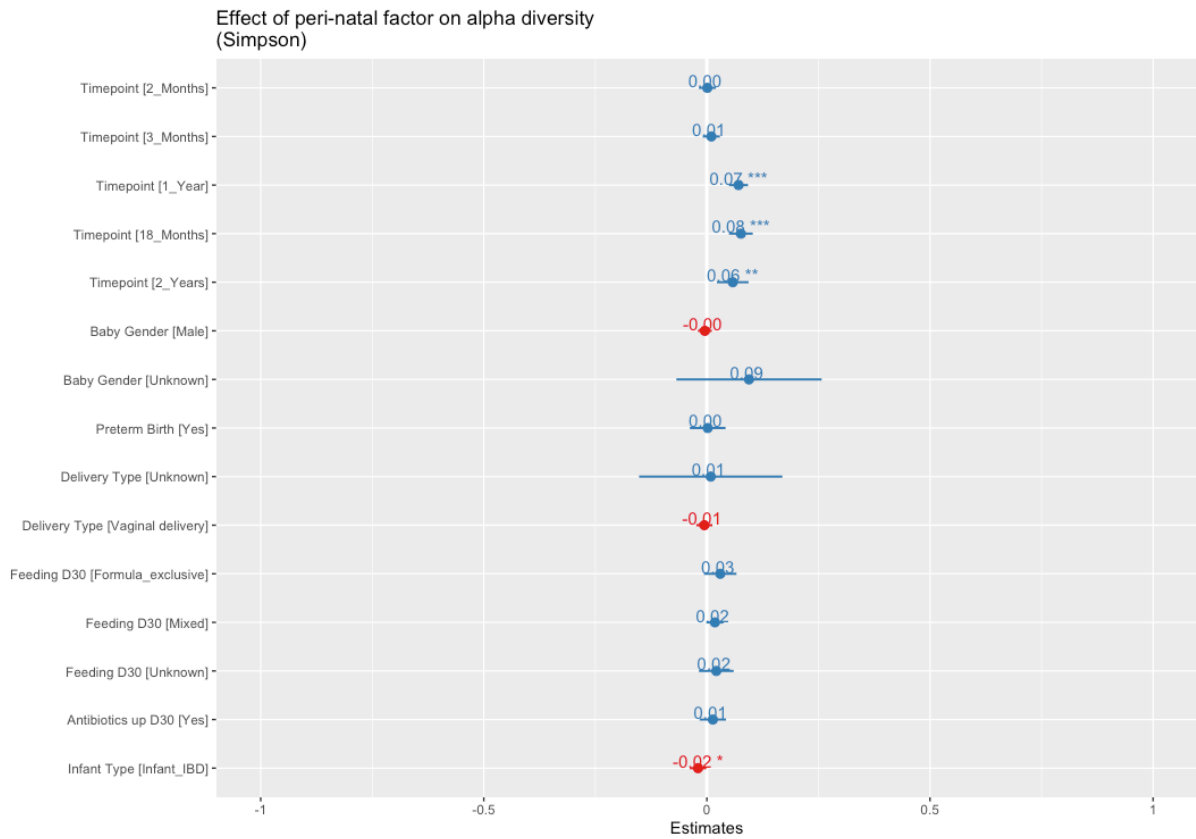

**Supplementary Figure S4**– Factors explaining the variation of alpha diversity. Estimated from linear mixed model. \* $p < 0.05$ ; \*\* $p = 0.001$ ; \*\*\* $p < 0.001$

## Supplementary Figure S5

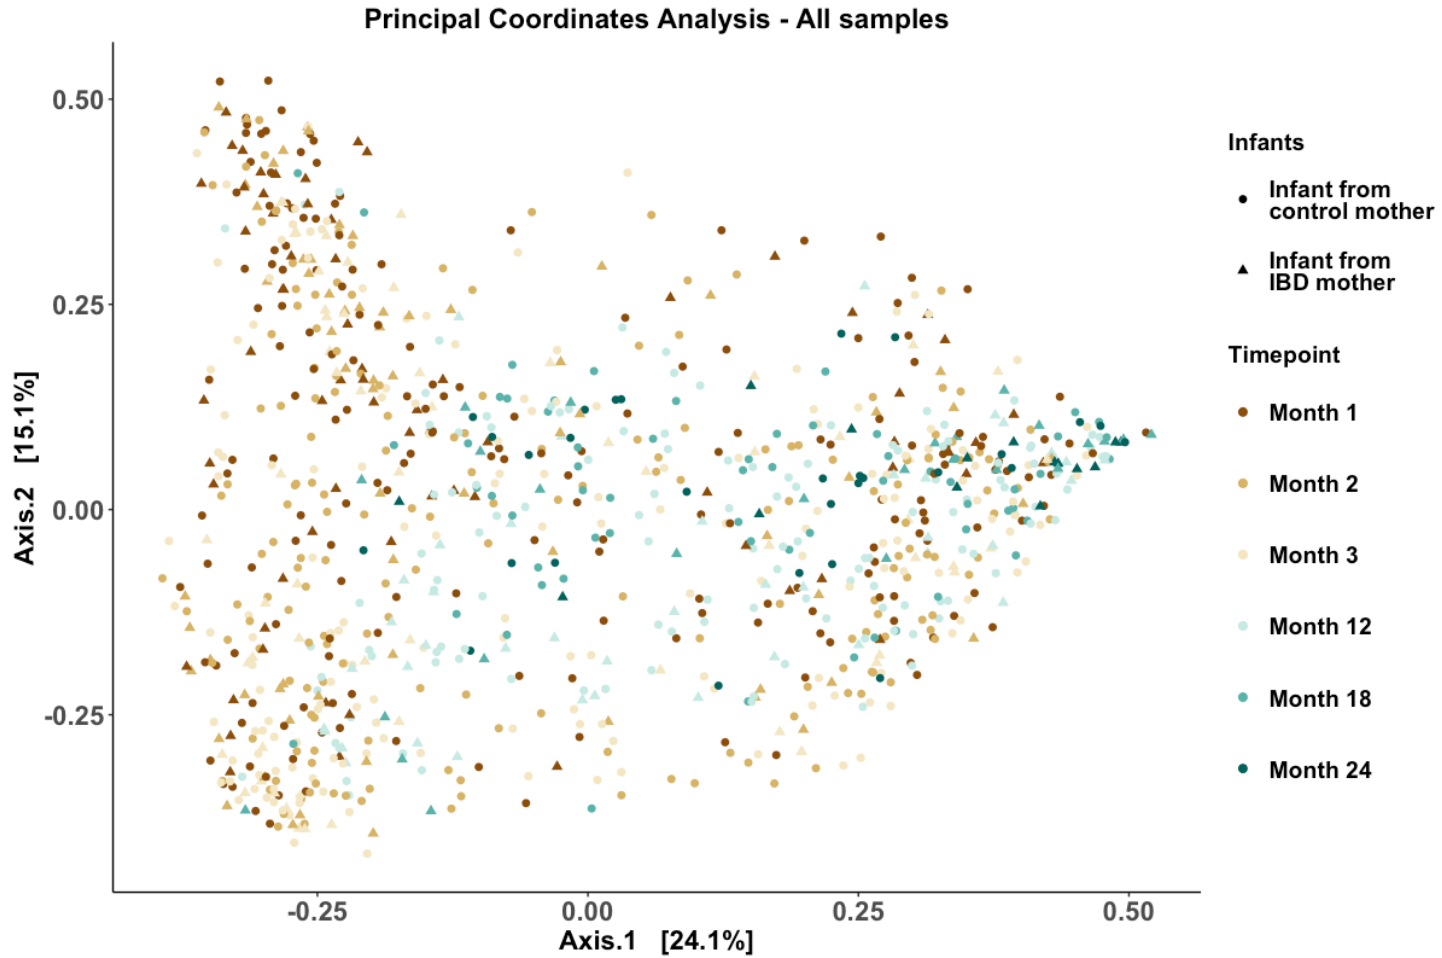

Supplementary Figure S5- Principal coordinates analysis including all samples.

## Supplementary Figure S6

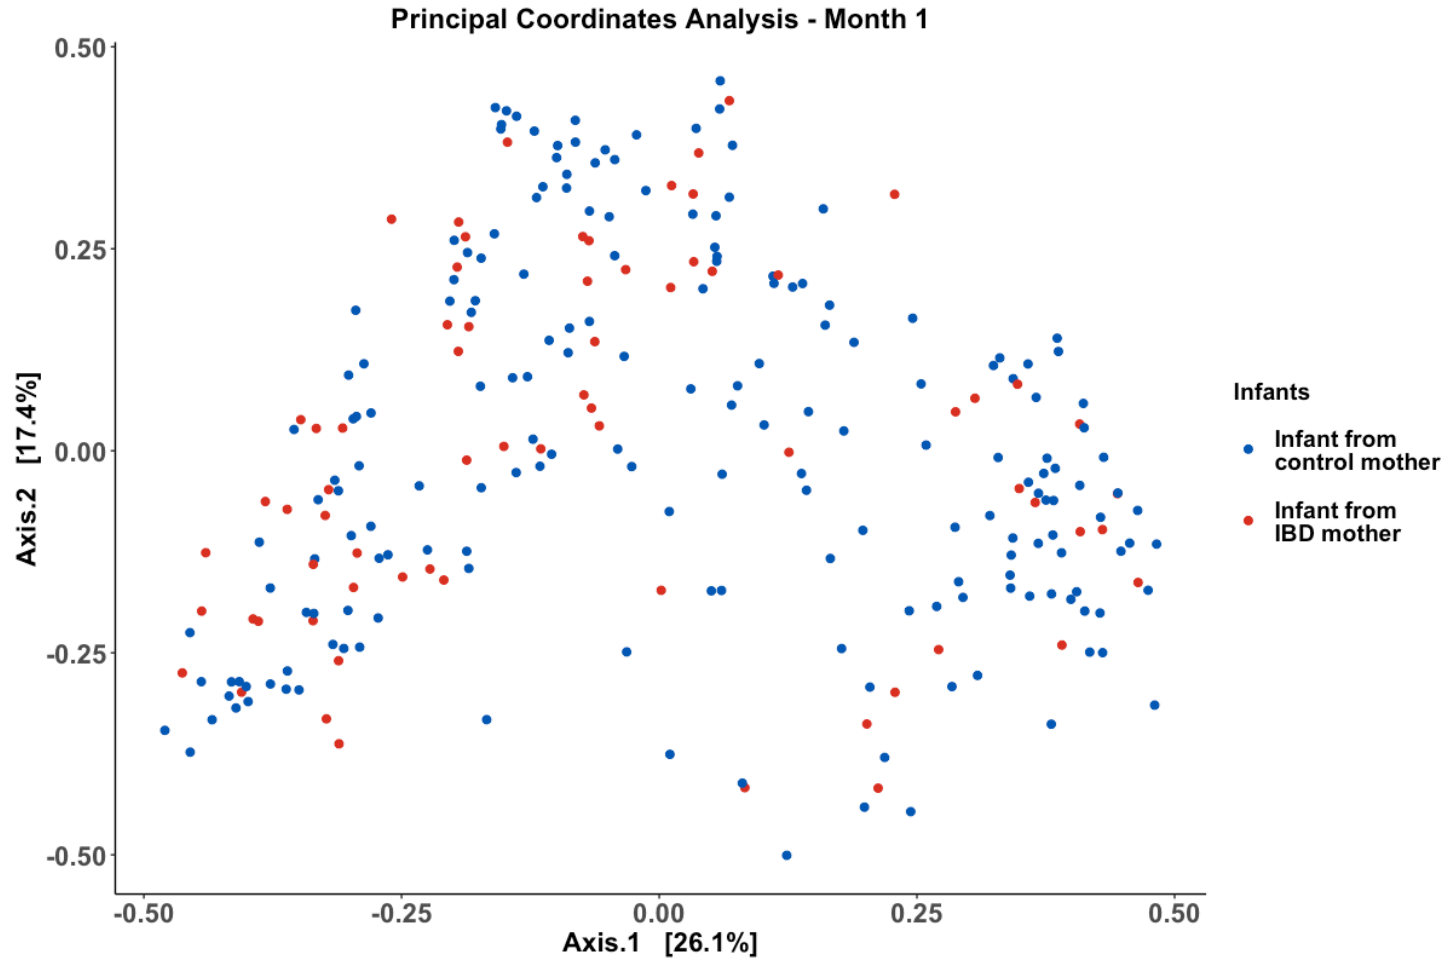

Supplementary Figure S6- Principal coordinates analysis including Month 1 samples.

## Supplementary Figure S7

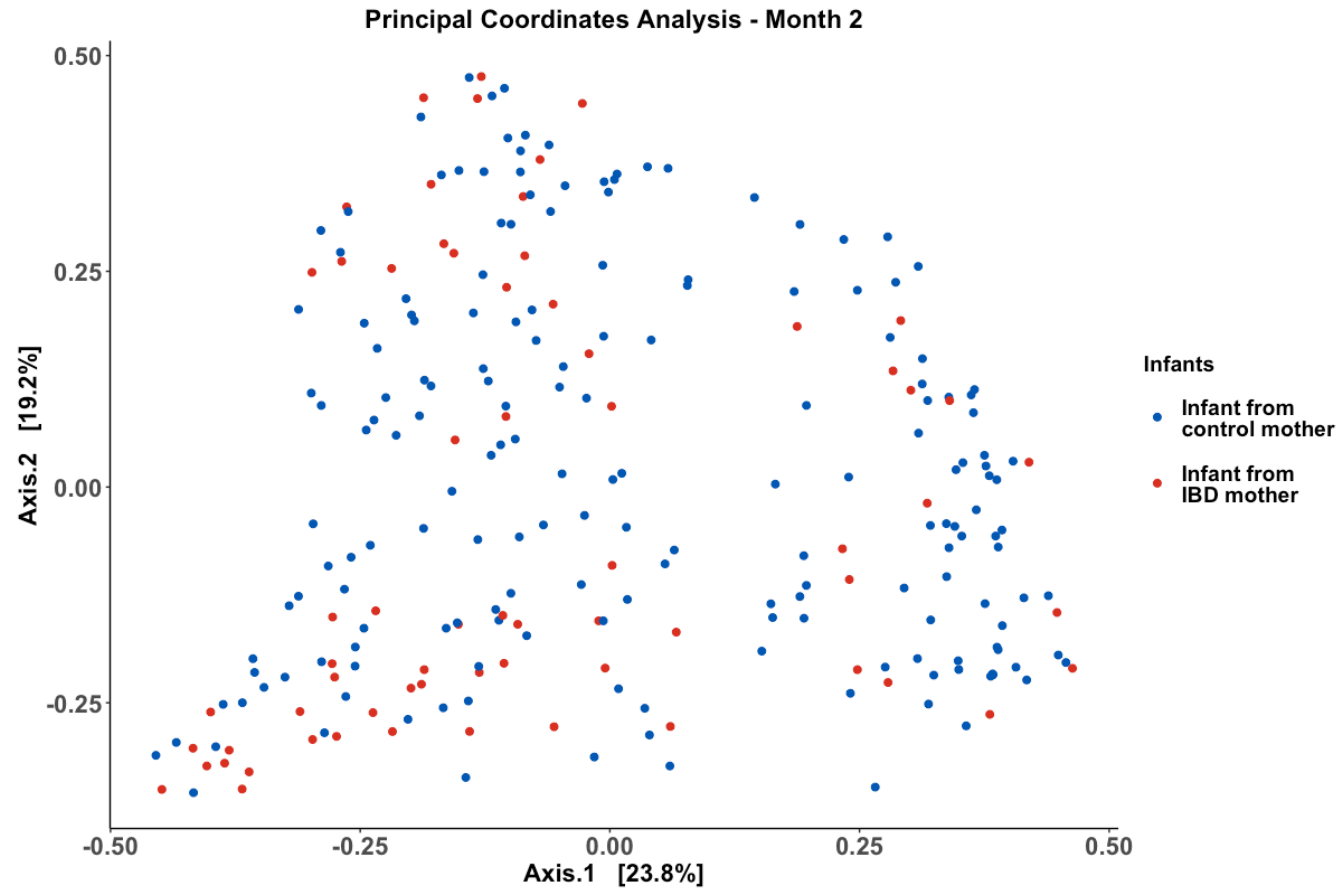

Supplementary Figure S7- Principal coordinates analysis including Month 2 samples.



## Supplementary Figure S8

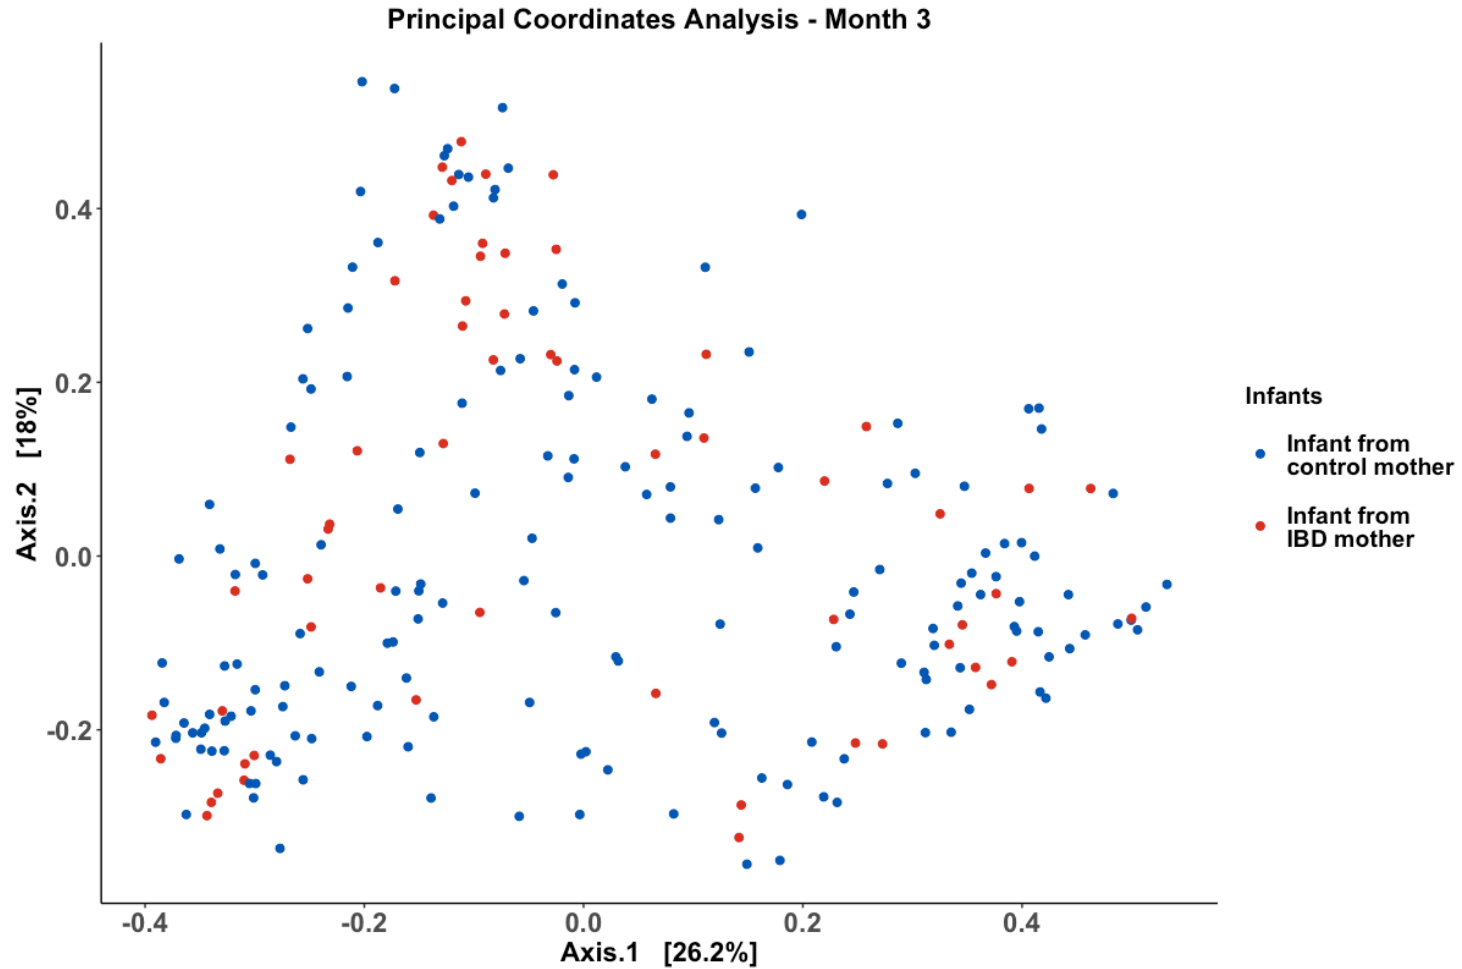

Supplementary Figure S8- Principal coordinates analysis including Month 3 samples.

## Supplementary Figure S9

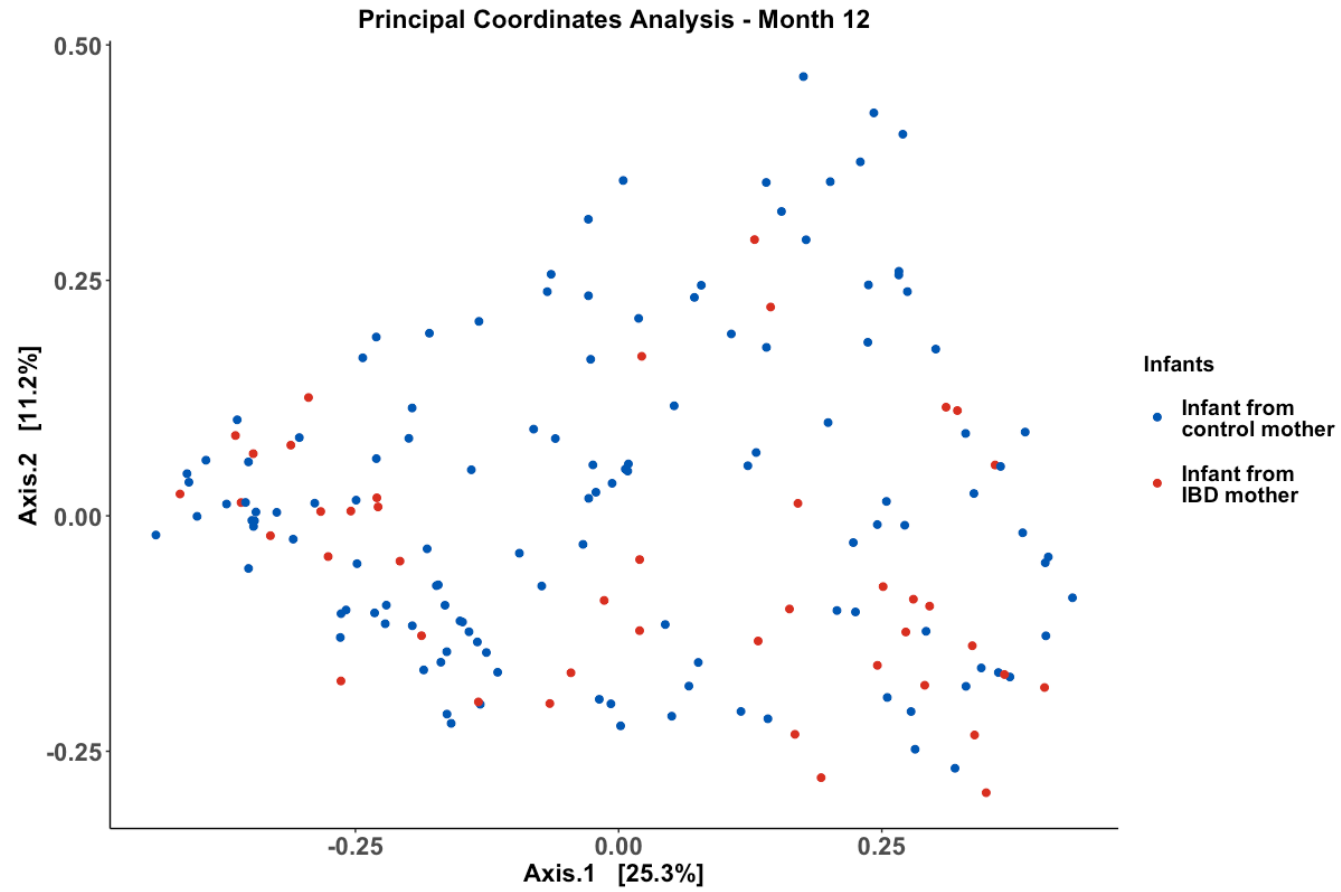

Supplementary Figure S9- Principal coordinates analysis including Month 12 samples.

**Supplementary Figure S10**  
Principal Coordinates Analysis - Month 18

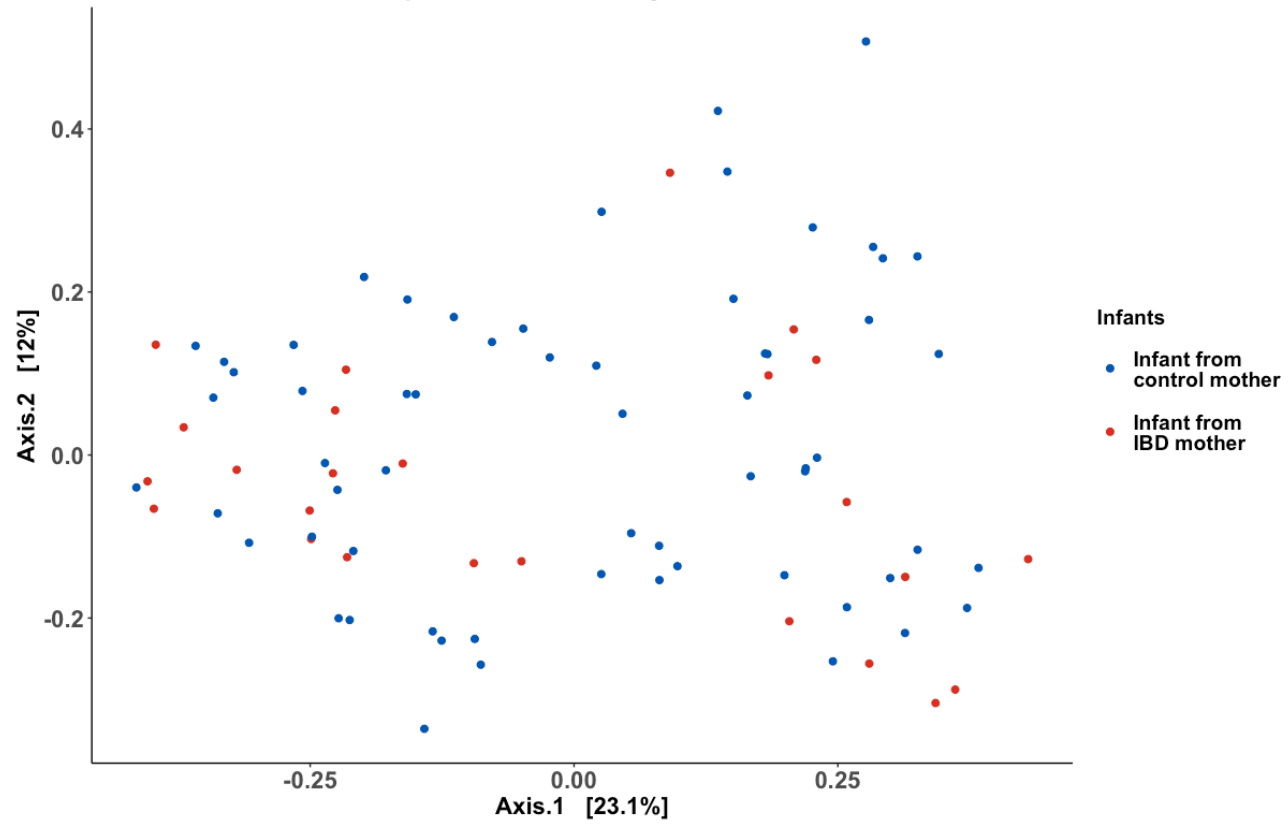

**Supplementary Figure S10-** Principal coordinates analysis including Month 18 samples.

**Supplementary Figure S11**



## Supplementary Figure S12

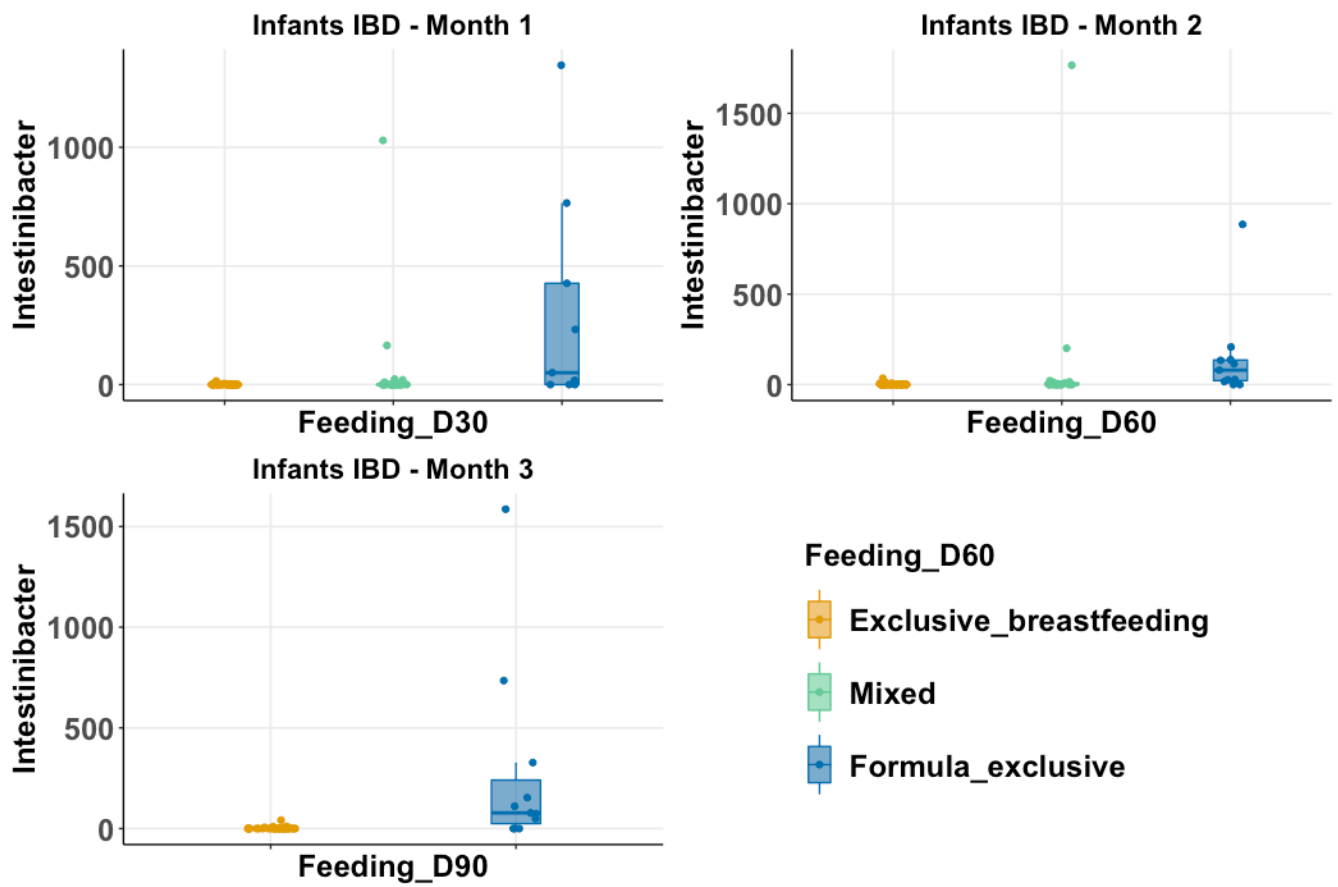

**Supplementary Figure S12-** Relative abundance of *Intestinibacter* genus according to feeding.

## Supplementary Figure 13

### Microbiota month 1 vs Olink

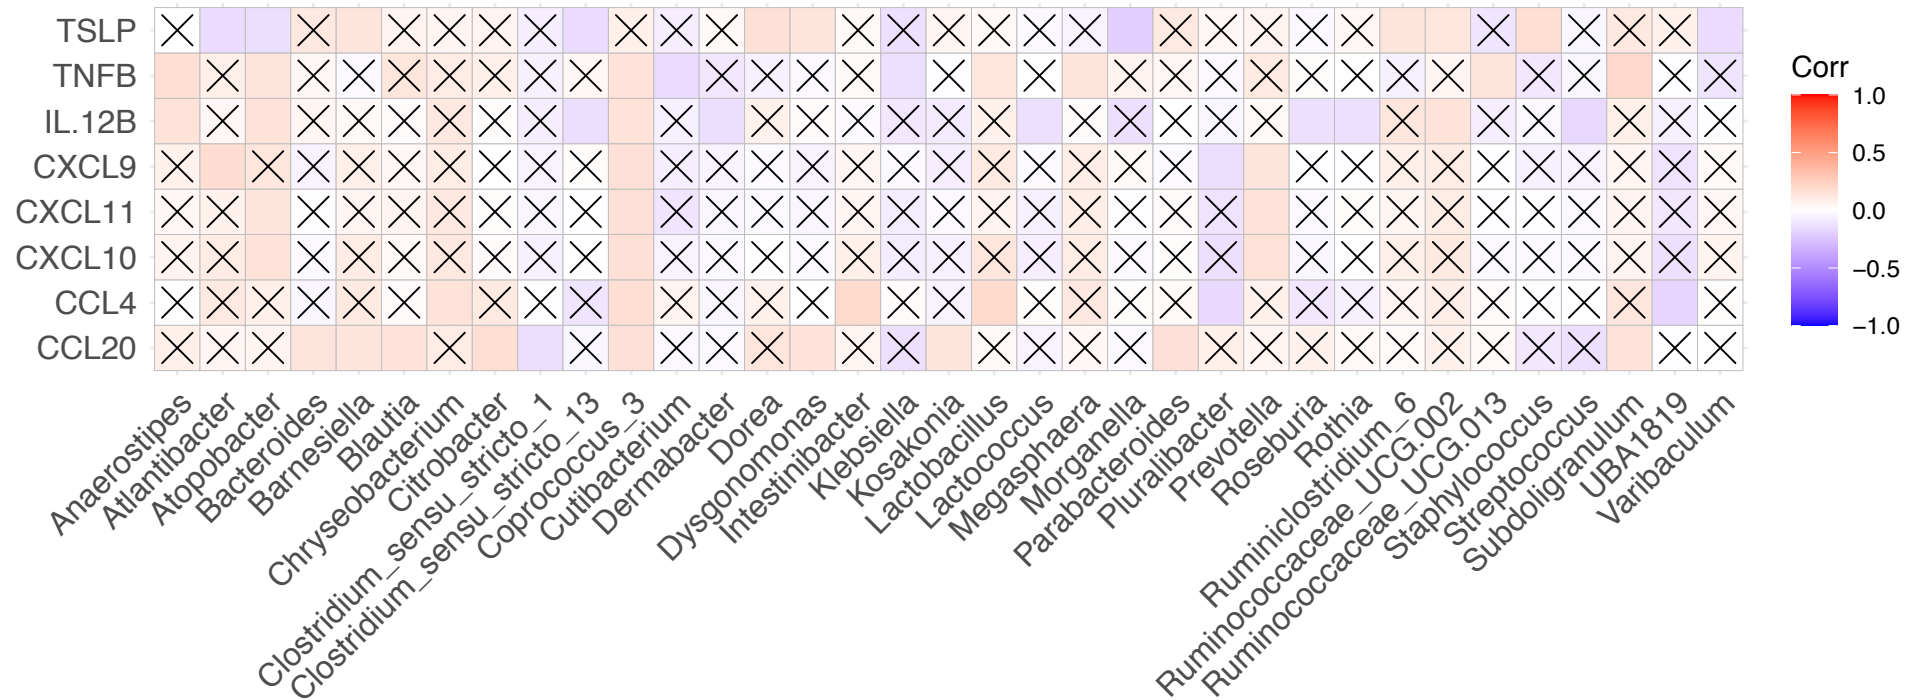

**Supplementary Figure S13**– Correlation between breast milk protein biomarkers that were significantly different between mothers with IBD and controls mothers and infant’s microbiota at month 1. Boxes with crosses indicate non-significant correlations. Boxes without crosses indicate statistically significant correlations.

## Supplementary Figure 14

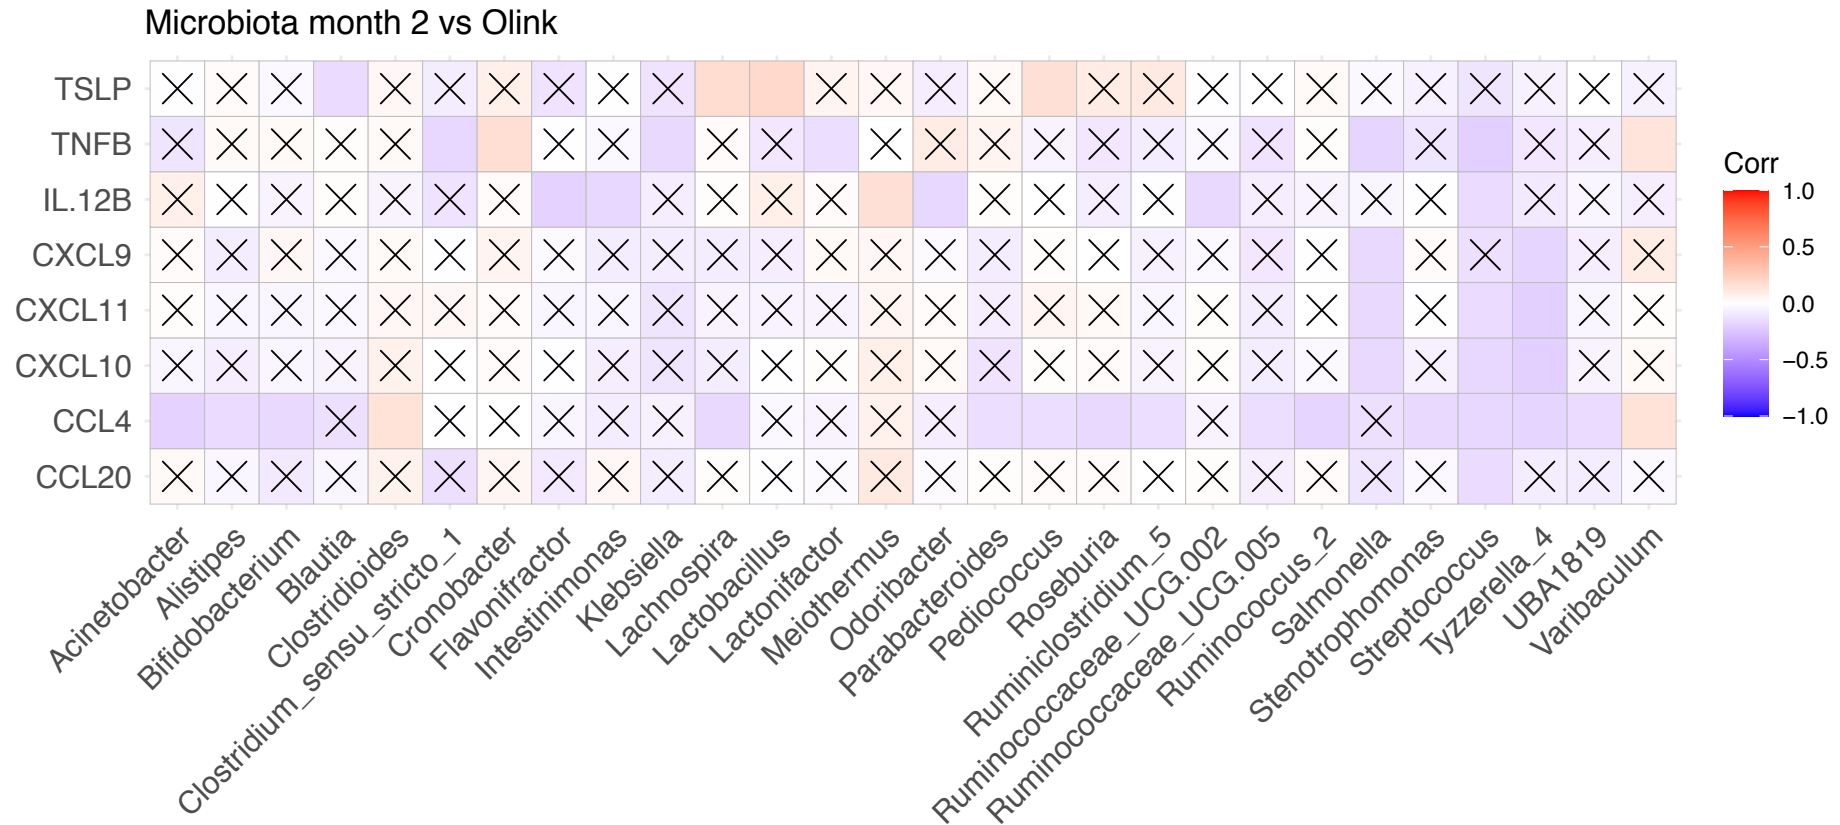

**Supplementary Figure S14**– Correlation between breast milk protein biomarkers that were significantly different between mothers with IBD and controls mothers and infant’s microbiota at month 2. Boxes with crosses indicate non-significant correlations. Boxes without crosses indicate statistically significant correlations.

## Supplementary Figure 15

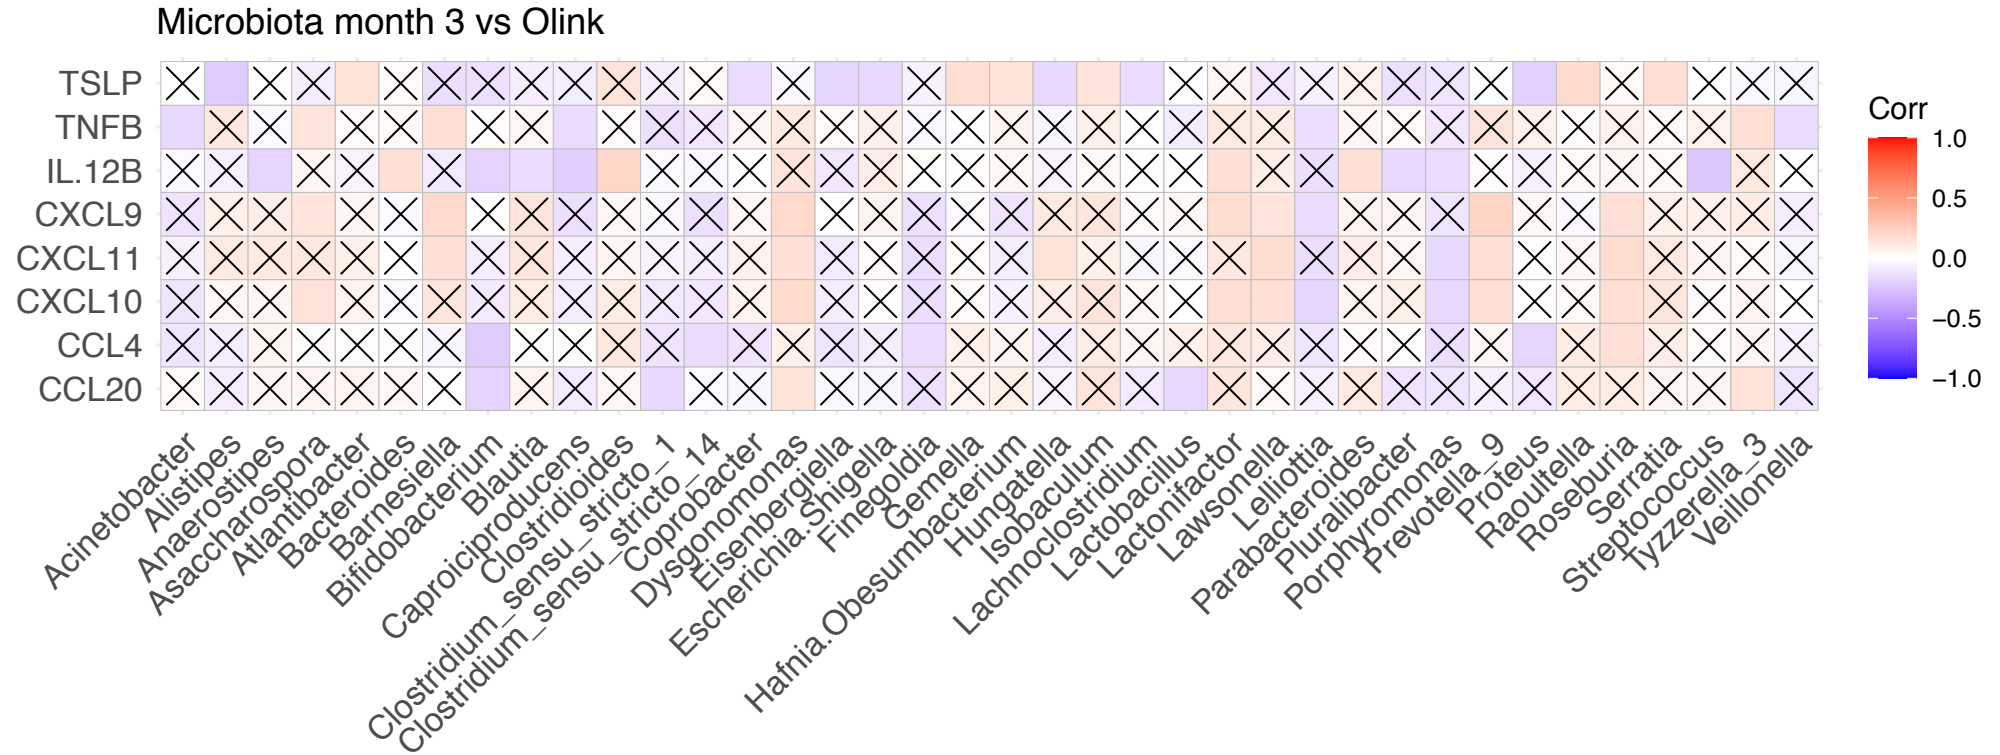

**Supplementary Figure S15**– Correlation between breast milk protein biomarkers that were significantly different between mothers with IBD and controls mothers and infant’s microbiota at month 3. Boxes with crosses indicate non-significant correlations. Boxes without crosses indicate statistically significant correlations.



## Supplementary Figure 16

Microbiota month 12 vs Olink

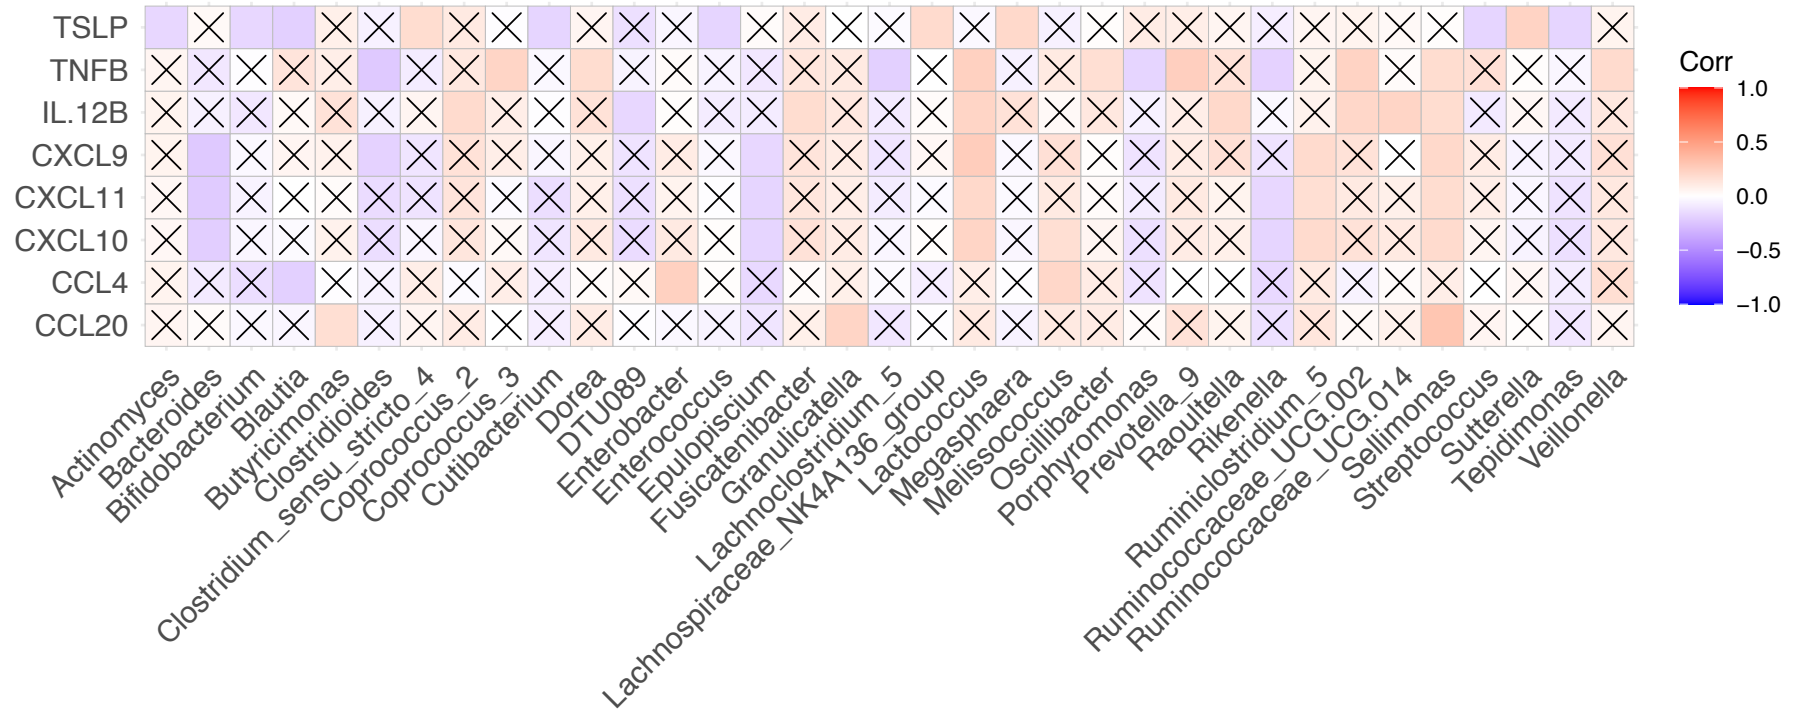

**Supplementary Figure S16**– Correlation between breast milk protein biomarkers that were significantly different between mothers with IBD and controls mothers and infant’s microbiota at month 12. Boxes with crosses indicate non-significant correlations. Boxes without crosses indicate statistically significant correlations.

## Supplementary Figure 17

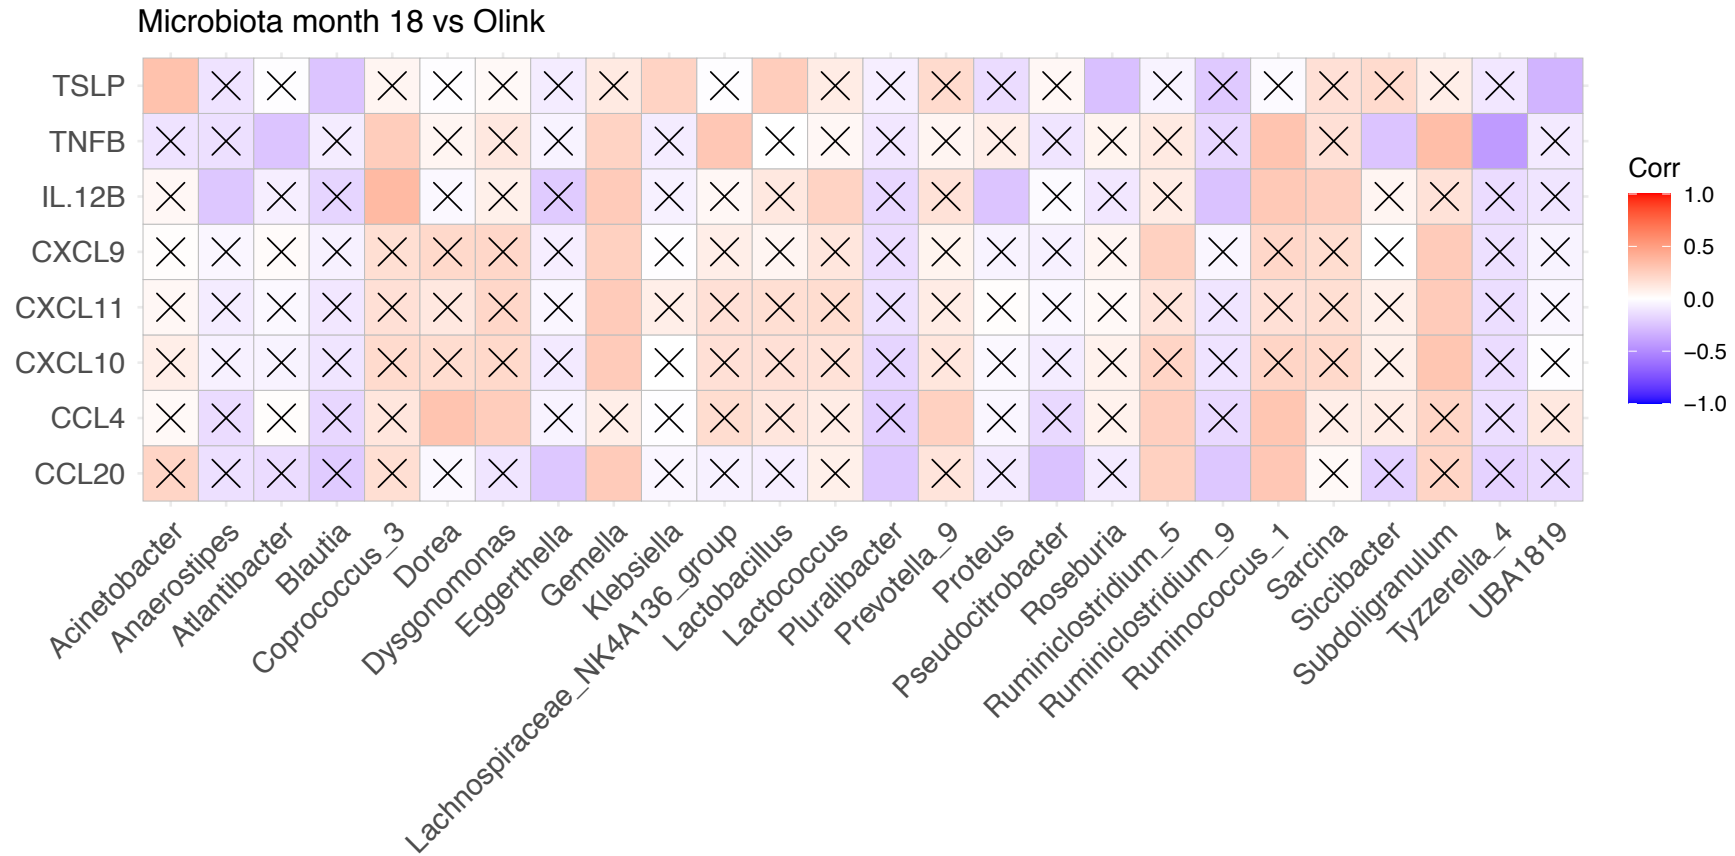

**Supplementary Figure S17**– Correlation between breast milk protein biomarkers that were significantly different between mothers with IBD and controls mothers and infant’s microbiota at month 18. Boxes with crosses indicate non-significant correlations. Boxes without crosses indicate statistically significant correlations.

## Supplementary Figure 18

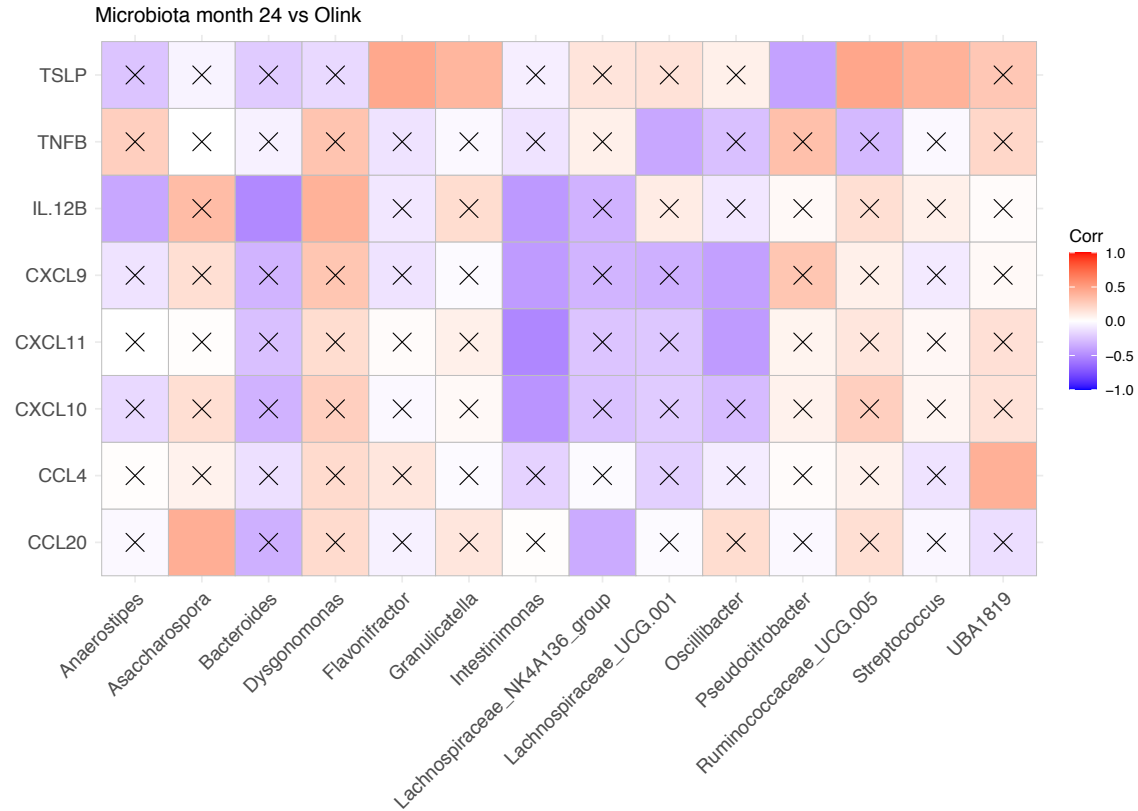

**Supplementary Figure S18**– Correlation between breast milk protein biomarkers that were significantly different between mothers with IBD and controls mothers and infant’s microbiota at month 24. Boxes with crosses indicate non-significant correlations. Boxes without crosses indicate statistically significant correlations.
